# Supplementary material
Source: PubMed Central journal article supplement (PMC3746704)
Supplement: npp201395x8.pdf [file npp201395x8.pdf]

a

|       | IL    | PrL   | Cg    | M2    | M1    | OF    | NAcbS | NAcbC | DMS   | DLS   |
|-------|-------|-------|-------|-------|-------|-------|-------|-------|-------|-------|
| IL    | 1.000 | .904* | .834* | .757  | .562  | .615  | .365  | .338  | .351  | .478  |
| PrL   | .904* | 1.000 | .935* | .931* | .766  | .350  | .254  | .150  | .229  | .513  |
| Cg    | .834* | .935* | 1.000 | .830* | .744  | .223  | .350  | -.087 | .057  | .376  |
| M2    | .757  | .931* | .830* | 1.000 | .811  | .370  | -.053 | .053  | -.023 | .319  |
| M1    | .562  | .766  | .744  | .811  | 1.000 | .028  | .300  | .197  | -.079 | .482  |
| OF    | .615  | .350  | .223  | .370  | .028  | 1.000 | -.226 | .284  | -.026 | -.180 |
| NAcbS | .365  | .254  | .350  | -.053 | .300  | -.226 | 1.000 | .450  | .553  | .713  |
| NAcbC | .338  | .150  | -.087 | .053  | .197  | .284  | .450  | 1.000 | .663  | .685  |
| DMS   | .351  | .229  | .057  | -.023 | -.079 | -.026 | .553  | .663  | 1.000 | .812* |
| DLS   | .478  | .513  | .376  | .319  | .482  | -.180 | .713  | .685  | .812* | 1.000 |

b

|       | IL    | PrL   | Cg    | M2    | M1     | OF    | NAcbS | NAcbC  | DMS   | DLS   |
|-------|-------|-------|-------|-------|--------|-------|-------|--------|-------|-------|
| IL    | 1.000 | .154  | -.400 | .674  | .668   | .075  | -.561 | -.578  | .047  | -.709 |
| PrL   | .154  | 1.000 | .657  | .416  | -.072  | -.382 | .253  | .294   | -.215 | -.352 |
| Cg    | -.400 | .657  | 1.000 | .171  | -.226  | -.279 | .602  | .356   | -.614 | -.151 |
| M2    | .674  | .416  | .171  | 1.000 | .816*  | .446  | -.173 | -.520  | -.366 | -.482 |
| M1    | .668  | -.072 | -.226 | .816* | 1.000  | .591  | -.603 | -.897* | .003  | -.374 |
| OF    | .075  | -.382 | -.279 | .446  | .591   | 1.000 | -.037 | -.364  | -.108 | .440  |
| NAcbS | -.561 | .253  | .602  | -.173 | -.603  | -.037 | 1.000 | .822*  | -.703 | .330  |
| NAcbC | -.578 | .294  | .356  | -.520 | -.897* | -.364 | .822* | 1.000  | -.235 | .420  |
| DMS   | .047  | -.215 | -.614 | -.366 | .003   | -.108 | -.703 | -.235  | 1.000 | .255  |
| DLS   | -.709 | -.352 | -.151 | -.482 | -.374  | .440  | .330  | .420   | .255  | 1.000 |

c

|       | IL     | PrL    | Cg     | M2    | M1     | OF    | NAcbS | NAcbC | DMS   | DLS    |
|-------|--------|--------|--------|-------|--------|-------|-------|-------|-------|--------|
| IL    | 1.000  | .888*  | .826*  | .203  | .676   | .666  | -.618 | -.506 | -.081 | -.887* |
| PrL   | .888*  | 1.000  | .871*  | .387  | .775   | .324  | -.588 | -.241 | -.067 | -.842* |
| Cg    | .826*  | .871*  | 1.000  | .590  | .827*  | .326  | -.500 | .037  | -.219 | -.938* |
| M2    | .203   | .387   | .590   | 1.000 | .489   | .042  | -.575 | .412  | -.671 | -.451  |
| M1    | .676   | .775   | .827*  | .489  | 1.000  | .042  | -.554 | .194  | -.455 | -.906* |
| OF    | .666   | .324   | .326   | .042  | .042   | 1.000 | -.566 | -.794 | -.143 | -.415  |
| NAcbS | -.618  | -.588  | -.500  | -.575 | -.554  | -.566 | 1.000 | .360  | .721  | .608   |
| NAcbC | -.506  | -.241  | .037   | .412  | .194   | -.794 | .360  | 1.000 | -.218 | .086   |
| DMS   | -.081  | -.067  | -.219  | -.671 | -.455  | -.143 | .721  | -.218 | 1.000 | .349   |
| DLS   | -.887* | -.842* | -.938* | -.451 | -.906* | -.415 | .608  | .086  | .349  | 1.000  |

d

|       | IL    | PrL   | Cg    | M2    | M1    | OF     | NAcbS | NAcbC  | DMS    | DLS    |
|-------|-------|-------|-------|-------|-------|--------|-------|--------|--------|--------|
| IL    | 1.000 | -.159 | -.489 | .004  | -.543 | .479   | -.299 | -.512  | -.491  | -.586  |
| PrL   | -.159 | 1.000 | .687  | .558  | .582  | .453   | -.409 | -.327  | -.446  | -.148  |
| Cg    | -.489 | .687  | 1.000 | .366  | .544  | .086   | .084  | -.023  | .173   | .162   |
| M2    | .004  | .558  | .366  | 1.000 | .319  | -.048  | .144  | .177   | -.211  | .155   |
| M1    | -.543 | .582  | .544  | .319  | 1.000 | -.121  | .319  | .470   | .221   | .619   |
| OF    | .479  | .453  | .086  | -.048 | -.121 | 1.000  | -.665 | -.792* | -.838* | -.827* |
| NAcbS | -.299 | -.409 | .084  | .144  | .319  | -.665  | 1.000 | .894*  | .770*  | .805*  |
| NAcbC | -.512 | -.327 | -.023 | .177  | .470  | -.792* | .894* | 1.000  | .719*  | .931*  |
| DMS   | -.491 | -.446 | .173  | -.211 | .221  | -.838* | .770* | .719*  | 1.000  | .811*  |
| DLS   | -.586 | -.148 | .162  | .155  | .619  | -.827* | .805* | .931*  | .811*  | 1.000  |

e

|       | IL    | PrL   | Cg    | M2    | M1    | OF    | NAcbS | NAcbC | DMS   | DLS   |
|-------|-------|-------|-------|-------|-------|-------|-------|-------|-------|-------|
| IL    | 1.000 | .924* | .389  | .323  | .394  | -.210 | .409  | .074  | .509  | .492  |
| PrL   | .924* | 1.000 | .599  | .320  | .622  | -.057 | .155  | .201  | .387  | .420  |
| Cg    | .389  | .599  | 1.000 | .792  | .762  | .210  | -.332 | .030  | -.271 | -.167 |
| M2    | .323  | .320  | .792  | 1.000 | .493  | .104  | -.081 | -.212 | -.247 | -.208 |
| M1    | .394  | .622  | .762  | .493  | 1.000 | .334  | -.397 | .266  | .126  | .173  |
| OF    | -.210 | -.057 | .210  | .104  | .334  | 1.000 | .193  | .866* | .348  | .486  |
| NAcbS | .409  | .155  | -.332 | -.081 | -.397 | .193  | 1.000 | .412  | .712  | .717  |
| NAcbC | .074  | .201  | .030  | -.212 | .266  | .866* | .412  | 1.000 | .664  | .784  |
| DMS   | .509  | .387  | -.271 | -.247 | .126  | .348  | .712  | .664  | 1.000 | .980* |
| DLS   | .492  | .420  | -.167 | -.208 | .173  | .486  | .717  | .784  | .980* | 1.000 |

f

|       | IL    | PrL   | Cg    | M2    | M1    | OF    | NAcbS | NAcbC | DMS   | DLS   |
|-------|-------|-------|-------|-------|-------|-------|-------|-------|-------|-------|
| IL    | 1.000 | .880  | .561  | .411  | .046  | .805  | -.109 | -.609 | .582  | .612  |
| PrL   | .880  | 1.000 | .867  | .789  | .472  | .950  | .173  | -.169 | .898  | .873  |
| Cg    | .561  | .867  | 1.000 | .904  | .848  | .772  | .175  | .223  | .971* | .991* |
| M2    | .411  | .789  | .904  | 1.000 | .782  | .831  | .579  | .472  | .969* | .839  |
| M1    | .046  | .472  | .848  | .782  | 1.000 | .373  | .176  | .605  | .775  | .818  |
| OF    | .805  | .950  | .772  | .831  | .373  | 1.000 | .450  | -.044 | .875  | .742  |
| NAcbS | -.109 | .173  | .175  | .579  | .176  | .450  | 1.000 | .647  | .381  | .044  |
| NAcbC | -.609 | -.169 | .223  | .472  | .605  | -.044 | .647  | 1.000 | .271  | .113  |
| DMS   | .582  | .898  | .971* | .969* | .775  | .875  | .381  | .271  | 1.000 | .938  |
| DLS   | .612  | .873  | .991* | .839  | .818  | .742  | .044  | .113  | .938  | 1.000 |
