# Supplementary material
Source: PubMed Central journal article supplement (PMC3746704)

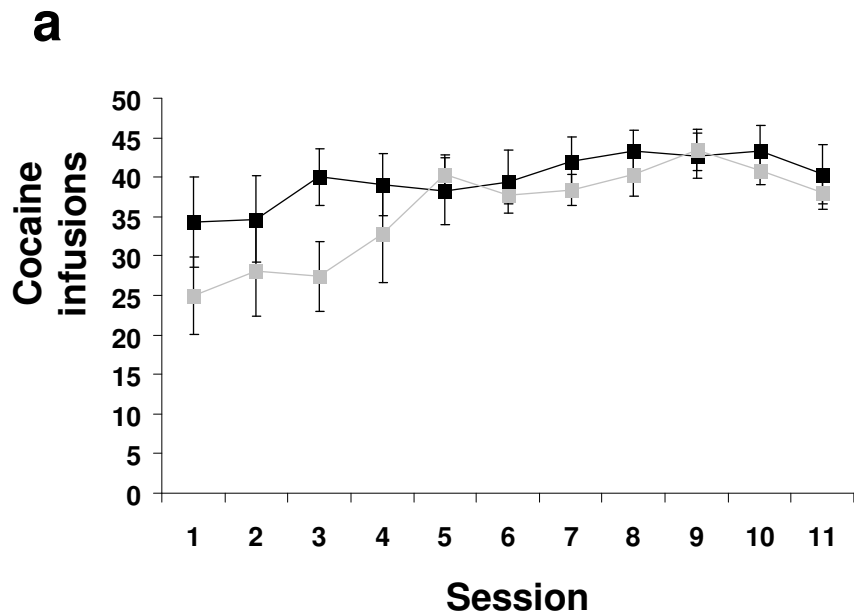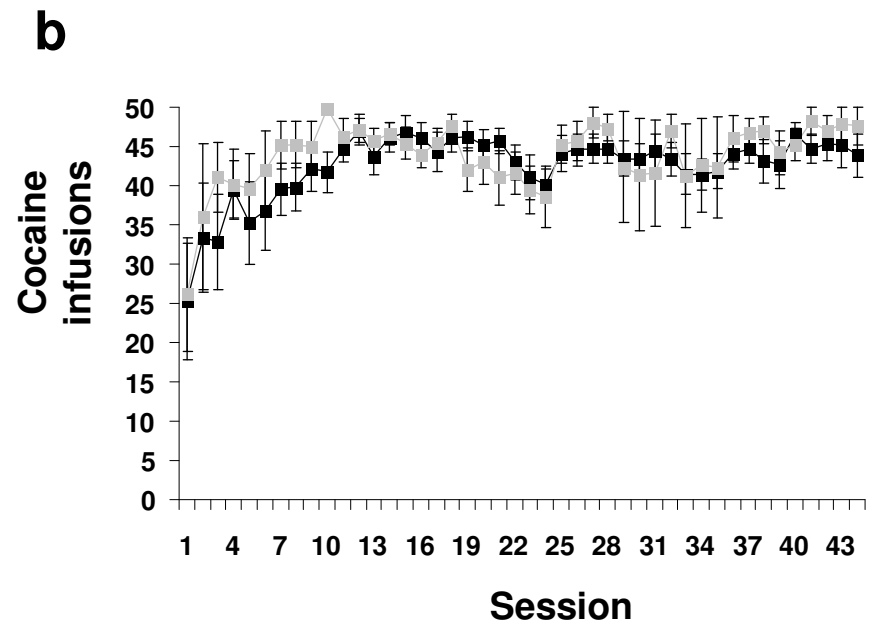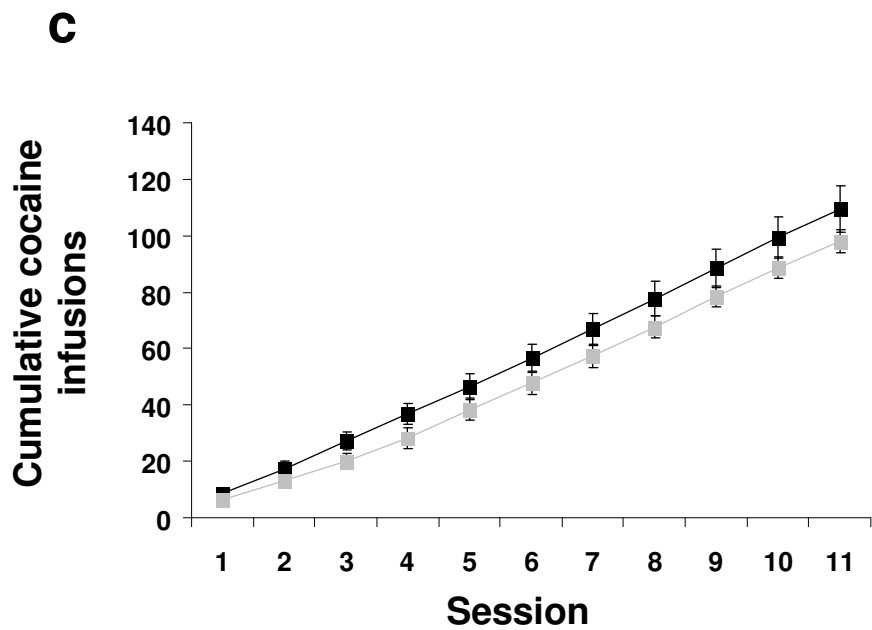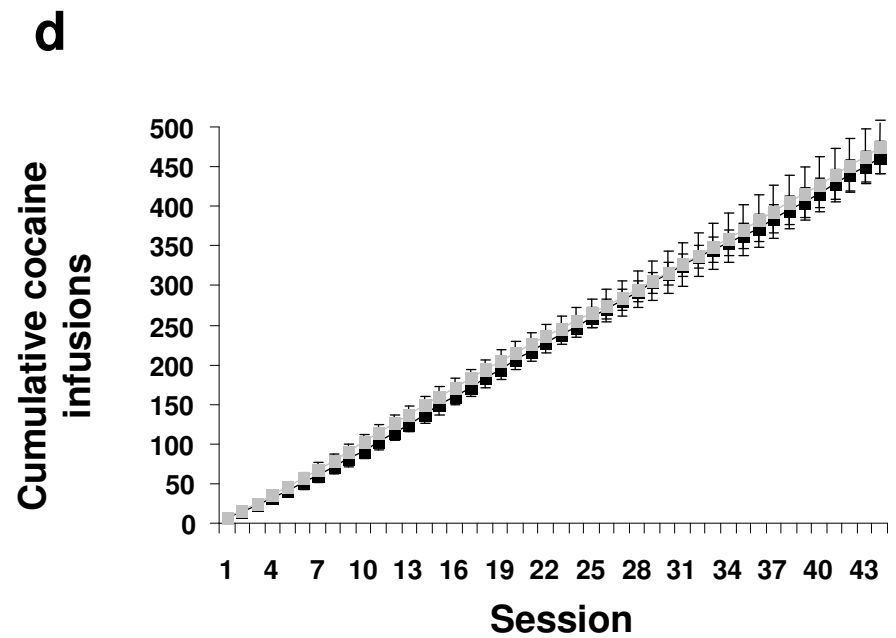

■ HI    ■ LI

Supplement: npp201395x2.pdf [file npp201395x2.pdf]
